# Supplementary material
Source: ML conference proceedings conference paper supplement (https://aclanthology.org/D18-1363)
Supplement: Attachment [file emnlp-transductive-neural-3-12.pdf › emnlp-transductive-neural-3-12.pdf]

## A Detailed Experimental Results by Language

|    |            | SET1  |       |       |            |        |             | SET2  |       |       |       |            |        | SET3        |       |       |       |       |            |        |             |
|----|------------|-------|-------|-------|------------|--------|-------------|-------|-------|-------|-------|------------|--------|-------------|-------|-------|-------|-------|------------|--------|-------------|
|    |            | COPY  | PT    | SIG17 | SIG17+SHIP | MED+PT | MED+PT+SHIP | COPY  | MED   | PT    | SIG17 | SIG17+SHIP | MED+PT | MED+PT+SHIP | COPY  | MED   | PT    | SIG17 | SIG17+SHIP | MED+PT | MED+PT+SHIP |
| 1  | albanian   | .0385 | .0305 | .1224 | .2742      | .6793  | .6568       | .0385 | .0055 | .0305 | .8362 | .2335      | .8786  | .8891       | .0385 | .1808 | .0305 | .8951 | .4276      | .9750  | .9700       |
| 2  | arabic     | .0334 | .0445 | .4262 | .4744      | .8191  | .8006       | .0334 | .0378 | .0445 | .5389 | .7265      | .8962  | .9096       | .0334 | .3988 | .0445 | .5567 | .7509      | .9400  | .9526       |
| 3  | armenian   | .0233 | .0841 | .7912 | .9002      | .9235  | .9174       | .0233 | .0319 | .0841 | .8089 | .9706      | .9762  | .9787       | .0233 | .5297 | .0841 | .8611 | .8049      | .9919  | .9899       |
| 4  | basque     | .0004 | .6743 | .0050 | .1034      | .9298  | .9427       | .0004 | .0108 | .6743 | .0457 | .0968      | .9132  | .9190       | -     | -     | -     | -     | -          | -      | -           |
| 5  | bengali    | .0357 | .0127 | .7720 | .9019      | .6675  | .6599       | .0357 | .0102 | .0127 | .8586 | .9172      | .8344  | .8089       | .0357 | .0701 | .0127 | .8752 | .9248      | .8675  | .8713       |
| 6  | bookmal    | .1321 | .0377 | .4025 | .4151      | .1069  | .1069       | .1321 | .0377 | .0377 | .5094 | .5094      | .3585  | .3585       | .1321 | .4277 | .0377 | .6792 | .6855      | .5094  | .5157       |
| 7  | bulgarian  | .0854 | .0151 | .3920 | .4958      | .4807  | .4774       | .0854 | .0318 | .0151 | .4908 | .5444      | .5243  | .5427       | .0854 | .2663 | .0151 | .7471 | .8425      | .8208  | .8191       |
| 8  | catalan    | .0173 | .0210 | .9407 | .9346      | .8758  | .8655       | .0173 | .0415 | .0210 | .9533 | .9706      | .9659  | .9641       | .0173 | .5626 | .0210 | .9603 | .9795      | .9897  | .9874       |
| 9  | czech      | .1255 | .0498 | .2656 | .3503      | .2873  | .3122       | .1255 | .0166 | .0498 | .5643 | .5873      | .5332  | .5373       | .1255 | .2739 | .0498 | .8579 | .8794      | .8444  | .8423       |
| 10 | danish     | .1738 | .0230 | .4230 | .4230      | .1705  | .1738       | .1738 | .0492 | .0230 | .7016 | .7016      | .4918  | .5016       | .1738 | .4984 | .0230 | .7574 | .7541      | .3541  | .4066       |
| 11 | dutch      | .1661 | .0018 | .4963 | .5664      | .4908  | .4982       | .1661 | .0424 | .0018 | .6771 | .8653      | .7841  | .7915       | .1661 | .4317 | .0018 | .7804 | .8856      | .8727  | .8727       |
| 12 | english    | .2080 | .0240 | .7640 | .7640      | .4000  | .4000       | .2080 | .0600 | .0240 | .8400 | .8400      | .7360  | .7360       | .2080 | .6680 | .0240 | .9120 | .9120      | .8440  | .8440       |
| 13 | estonian   | .0373 | .0210 | .3888 | .6857      | .7881  | .7992       | .0373 | .0081 | .0210 | .6257 | .7119      | .9173  | .9173       | .0373 | .2893 | .0210 | .7730 | .7189      | .9761  | .9796       |
| 14 | faroeese   | .1570 | .0239 | .4978 | .5755      | .3991  | .3946       | .1570 | .0149 | .0239 | .5919 | .6831      | .6069  | .6024       | .1570 | .3602 | .0239 | .7010 | .7549      | .7175  | .7160       |
| 15 | finnish    | .0650 | .0257 | .6082 | .7630      | .6330  | .6236       | .0650 | .0274 | .0257 | .6279 | .8896      | .8777  | .8760       | .0650 | .3311 | .0257 | .6929 | .9264      | .9615  | .9504       |
| 16 | french     | .0213 | .0142 | .8709 | .9040      | .8918  | .8943       | .0213 | .0930 | .0142 | .8516 | .9233      | .9487  | .9517       | .0213 | .6880 | .0142 | .9263 | .9548      | .9964  | .9980       |
| 17 | gaelic     | .3684 | .0202 | .4413 | .5061      | .4170  | .3927       | .3684 | .0000 | .0202 | .4130 | .4858      | .4413  | .4575       | -     | -     | -     | -     | -          | -      | -           |
| 18 | georgian   | .0534 | .0036 | .7886 | .8682      | .7684  | .7613       | .0534 | .1235 | .0036 | .8242 | .8967      | .8753  | .8646       | .0534 | .6211 | .0036 | .9097 | .9549      | .9335  | .9477       |
| 19 | german     | .2959 | .0174 | .6983 | .7466      | .6460  | .6267       | .2959 | .0000 | .0174 | .7041 | .8375      | .7485  | .7563       | .2959 | .4391 | .0174 | .7640 | .8549      | .8743  | .8743       |
| 20 | haida      | .0087 | .0981 | .4715 | .9452      | .9279  | .9611       | .0087 | .0000 | .0981 | .6453 | .9481      | .9394  | .9762       | -     | -     | -     | -     | -          | -      | -           |
| 21 | hebrew     | .0507 | .0178 | .3238 | .6148      | .6548  | .6459       | .0507 | .2109 | .0178 | .4270 | .6530      | .8639  | .8585       | .0507 | .5329 | .0178 | .5427 | .6984      | .9137  | .9377       |
| 22 | hindi      | .0038 | .6005 | .6449 | .7082      | .9405  | .9264       | .0038 | .0000 | .6005 | .7031 | .8565      | .9504  | .9496       | .0038 | .3621 | .6005 | .9539 | .4922      | .9979  | 1.000       |
| 23 | hungarian  | .0310 | .0038 | .1791 | .5489      | .5435  | .5488       | .0310 | .0060 | .0038 | .4452 | .7621      | .7498  | .7415       | .0310 | .3447 | .0038 | .5412 | .8237      | .9108  | .9146       |
| 24 | icelandic  | .1640 | .0148 | .4579 | .5657      | .4106  | .4136       | .1640 | .0295 | .0148 | .5451 | .6721      | .4993  | .5288       | .1640 | .2393 | .0148 | .6691 | .7474      | .7696  | .7430       |
| 25 | irish      | .1971 | .0128 | .3230 | .4343      | .3248  | .3285       | .1971 | .0109 | .0128 | .4033 | .4872      | .5675  | .5766       | .1971 | .2518 | .0128 | .4799 | .5712      | .6788  | .6588       |
| 26 | italian    | .0186 | .0100 | .6643 | .7200      | .6962  | .6976       | .0186 | .0190 | .0100 | .7186 | .7767      | .9052  | .9233       | .0186 | .3171 | .0100 | .7305 | .7848      | .9733  | .9719       |
| 27 | khaling    | .0209 | .5773 | .4230 | .4422      | .9686  | .9716       | .0007 | .2258 | .5773 | .5820 | .6208      | .9918  | .9895       | .0007 | .6979 | .5773 | .7908 | .6583      | .9960  | .9983       |
| 28 | kurmanji   | .0817 | .0174 | .7843 | .8017      | .4591  | .4539       | .0817 | .0765 | .0174 | .8835 | .8887      | .7965  | .8330       | .0817 | .7165 | .0174 | .9287 | .9165      | .9287  | .9183       |
| 29 | latin      | .0600 | .0146 | .2416 | .5198      | .3016  | .2899       | .0600 | .0000 | .0146 | .3909 | .8507      | .4905  | .5168       | .0600 | .2050 | .0146 | .4671 | .8814      | .6852  | .7379       |
| 30 | latvian    | .0735 | .0115 | .6888 | .7579      | .4971  | .5115       | .0735 | .0101 | .0115 | .7983 | .8919      | .7752  | .7680       | .0735 | .5086 | .0115 | .8646 | .9669      | .9179  | .9150       |
| 31 | lithuanian | .0169 | .0125 | .3845 | .4951      | .4790  | .4835       | .0169 | .0134 | .0125 | .6619 | .8287      | .7395  | .7431       | .0169 | .2810 | .0125 | .6048 | .8582      | .8260  | .8359       |
| 32 | maced.     | .0959 | .0072 | .4249 | .6023      | .4149  | .4077       | .0959 | .0615 | .0072 | .8655 | .8898      | .7611  | .7954       | .0959 | .5722 | .0072 | .8970 | .9714      | .9614  | .9599       |
| 33 | navajo     | .0589 | .0014 | .2658 | .3563      | .0466  | .0370       | .0589 | .0616 | .0014 | .3315 | .4801      | .0329  | .0315       | .0589 | .2849 | .0014 | .3795 | .5695      | .0301  | .0137       |
| 34 | nynorsk    | .1043 | .0245 | .4233 | .4233      | .1043  | .1043       | .1043 | .0123 | .0245 | .6074 | .6074      | .3067  | .3129       | .1043 | .4785 | .0245 | .6442 | .6626      | .4172  | .4294       |
| 35 | persian    | .0218 | .2400 | .7342 | .1633      | .9880  | .9844       | .0218 | .0509 | .2400 | .7829 | .1815      | .9898  | .9960       | .0218 | .6073 | .2400 | .7644 | .1971      | .9993  | .9989       |
| 36 | polish     | .0986 | .0218 | .5672 | .6453      | .5928  | .5826       | .0986 | .0205 | .0218 | .8028 | .8271      | .7631  | .7452       | .0986 | .3995 | .0218 | .9001 | .8924      | .8515  | .8553       |
| 37 | portug.    | .0697 | .0432 | .9171 | .9694      | .9135  | .9190       | .0697 | .1058 | .0432 | .9529 | .9858      | .9784  | .9742       | .0697 | .6829 | .0432 | .9616 | .9861      | .9839  | .9823       |
| 38 | quechua    | .0083 | .5093 | .9133 | .9998      | .9835  | .9856       | .0083 | .2750 | .5093 | .9134 | .9999      | .9887  | .9926       | .0083 | .7852 | .5093 | .8913 | .9994      | .9965  | .9994       |
| 39 | romanian   | .0754 | .0133 | .1420 | .2500      | .1317  | .1213       | .0754 | .0074 | .0133 | .6154 | .7663      | .5814  | .6124       | .0754 | .2914 | .0133 | .7988 | .7825      | .7500  | .7544       |
| 40 | russian    | .1166 | .0092 | .4018 | .4617      | .3221  | .3528       | .1166 | .0598 | .0092 | .8298 | .8574      | .7715  | .7761       | .1166 | .6610 | .0092 | .8589 | .8712      | .8635  | .8650       |
| 41 | sami       | .0436 | .0048 | .1562 | .3986      | .2890  | .3046       | .0436 | .0155 | .0048 | .3172 | .8351      | .7856  | .7818       | .0436 | .2250 | .0048 | .4568 | .9108      | .9108  | .9176       |
| 42 | SCB        | .0870 | .2802 | .3007 | .3116      | .5266  | .5133       | .0870 | .0000 | .2802 | .3684 | .3744      | .6401  | .6196       | .0870 | .0918 | .2802 | .8575 | .7536      | .8829  | .8841       |
| 43 | slovak     | .1301 | .0053 | .4439 | .5365      | .3226  | .3012       | .1301 | .0160 | .0053 | .5936 | .6667      | .4011  | .3993       | .1301 | .3119 | .0053 | .6934 | .7184      | .6310  | .6275       |
| 44 | slovene    | .1094 | .0151 | .5774 | .7928      | .5925  | .5867       | .1094 | .0012 | .0151 | .6787 | .8510      | .8254  | .8661       | .1094 | .4505 | .0151 | .7648 | .9302      | .9430  | .9336       |
| 45 | sorani     | .0110 | .1285 | .5478 | .5435      | .6162  | .6272       | .0110 | .0042 | .1285 | .6839 | .5773      | .8216  | .8225       | .0110 | .2984 | .1285 | .7210 | .6044      | .8512  | .8529       |
| 46 | sorbian    | .0799 | .0237 | .3758 | .5643      | .5793  | .6080       | .0799 | .1024 | .0237 | .6592 | .8402      | .7328  | .7553       | .0799 | .5031 | .0237 | .8227 | .8901      | .8664  | .8739       |
| 47 | spanish    | .0144 | .0207 | .8067 | .8835      | .9186  | .9088       | .0144 | .0330 | .0207 | .9218 | .8884      | .9768  | .9709       | .0144 | .5884 | .0207 | .9358 | .8891      | .9853  | .9874       |
| 48 | swedish    | .1824 | .0441 | .4353 | .5118      | .2735  | .2735       | .1824 | .0441 | .0441 | .5735 | .7088      | .5176  | .5265       | .1824 | .4206 | .0441 | .7824 | .8471      | .7235  | .7353       |
| 49 | turkish    | .0168 | .0894 | .2050 | .6984      | .8748  | .8643       | .0168 | .0358 | .0894 | .7204 | .9258      | .9754  | .9740       | .0168 | .5388 | .0894 | .8673 | .9402      | .9934  | .9941       |
| 50 | ukrainian  | .0873 | .0159 | .4222 | .4921      | .3460  | .3206       | .0873 | .0413 | .0159 | .6714 | .6619      | .5857  | .5984       | .0873 | .3984 | .0159 | .7397 | .7619      | .7413  | .7508       |
| 51 | urdu       | .0264 | .5434 | .8059 | .8059      | .8754  | .8720       | .0264 | .0014 | .5434 | .8102 | .8102      | .9438  | .9485       | .0264 | .2007 | .5434 | .9533 | .7040      | .9887  | .9901       |
| 52 | welsh      | .0277 | .0147 | .5167 | .4319      | .9104  | .9128       | .0277 | .0513 | .0147 | .8280 | .8843      | .9707  | .9756       | .0277 | .3504 | .0147 | .8525 | .9446      | .9886  | .9919       |
| 53 | average    | .0810 | .0883 | .5012 | .5971      | .5808  | .5793       | .0810 | .0432 | .0883 | .6576 | .7355      | .7486  | .7547       | .0782 | .4211 | .0775 | .7707 | .8008      | .8454  | .8483       |

Table 4: Accuracy on PC for SIG17+SHIP (the shared task baseline SIG17 with SHIP), MED+PT (MED with paradigm transduction), and MED+PT+SHIP (MED with paradigm transduction and SHIP). We omit the column “MED” for SET1: all results were < .001 except for .0123 for Navajo. bookmal = Norwegian Bokmål, gaelic = Scottish Gaelic, maced. = Macedonian, nynorsk = Norwegian Nynorsk, portug. = Portuguese, sami = Northern Sami, SCB = Serbo-Croatian, sorbian = Lower Sorbian. Since Basque, Scottish Gaelic, and Haida are low-resource languages, no SET3 data is available.
